# Supplementary material for: Large excitonic effect on van der Waals interaction between two-dimensional semiconductors
Source: Royal Society of Chemistry journal article supplement (doi:10.1039/d0nr02152k), 2020-01-01
Supplement: d0nr02152k1.pdf [file d0nr02152k1.pdf]

# Electronic supplementary information for

## Large Excitonic Effect on van der Waals Interaction between Two-Dimensional Semiconductors

Jiabao Yang, Xiaofei Liu\*, and Wanlin Guo

*State Key Laboratory of Mechanics and Control of Mechanical Structures, Key Laboratory for Intelligent Nano Materials and Devices of Ministry of Education, Nanjing University of Aeronautics and Astronautics, Nanjing 210016, China*

**Table SI** Lattice constants  $a$ , effective thicknesses  $t$ , the absorption edge energies with ( $E_{\text{gap\_eh}}$ ) and without the electron-hole ( $e-h$ ) interaction ( $E_{\text{gap\_noeh}}$ ) of the representative two-dimensional semiconductors.

|                   | $a$ (Å) | $t$ (Å) | $E_{\text{gap\_eh}}$ (eV) | $E_{\text{gap\_noeh}}$ (eV) |
|-------------------|---------|---------|---------------------------|-----------------------------|
| BN                | 2.51    | 1.7     | 5.32                      | 7.38                        |
| SiC               | 3.10    | 1.0     | 2.62                      | 3.94                        |
| GeC               | 3.26    | 1.0     | 2.21                      | 3.34                        |
| BNF               | 2.67    | 2.3     | 5.22                      | 7.22                        |
| BNH               | 2.60    | 2.1     | 4.25                      | 6.08                        |
| CF                | 2.61    | 2.3     | 5.01                      | 6.99                        |
| CH                | 2.54    | 2.1     | 4.65                      | 6.16                        |
| SiF               | 3.97    | 2.6     | 1.52                      | 2.32                        |
| SiH               | 3.88    | 2.5     | 3.03                      | 3.90                        |
| CrO <sub>2</sub>  | 2.63    | 1.9     | 1.28                      | 2.59                        |
| CrS <sub>2</sub>  | 3.04    | 2.1     | 1.18                      | 2.07                        |
| CrSe <sub>2</sub> | 3.21    | 2.3     | 0.88                      | 1.68                        |
| CrTe <sub>2</sub> | 3.48    | 2.3     | 0.54                      | 1.19                        |
| MoO <sub>2</sub>  | 2.83    | 1.9     | 1.89                      | 3.13                        |
| MoS <sub>2</sub>  | 3.19    | 2.1     | 1.93                      | 2.85                        |
| MoSe <sub>2</sub> | 3.32    | 2.3     | 1.72                      | 2.54                        |
| MoTe <sub>2</sub> | 3.55    | 2.5     | 1.21                      | 1.90                        |
| WO <sub>2</sub>   | 2.84    | 1.9     | 2.20                      | 3.41                        |
| WS <sub>2</sub>   | 3.18    | 2.3     | 2.20                      | 3.03                        |
| WSe <sub>2</sub>  | 3.32    | 2.3     | 1.82                      | 2.59                        |
| WTe <sub>2</sub>  | 3.55    | 2.5     | 1.21                      | 1.84                        |
| GaS               | 3.64    | 1.5     | 3.63                      | 4.79                        |
| GaSe              | 3.82    | 2.0     | 3.01                      | 3.73                        |
| SnO               | 3.84    | 1.4     | 3.31                      | 4.72                        |

**Table SII** Critical frequencies  $\omega_c$  at which the sign of  $E_{eh}-E_{noeh}$  changes from plus to minus, ratios of enhanced vdW energy by the  $e-h$  interaction at an interlayer distance of 10000Å and ratios of static dielectric constant with the  $e-h$  interaction to that without the  $e-h$  interaction for the semiconductors.

|                   | $\omega_c$ (eV) | $(E_{eh}-E_{noeh})/E_{eh}$ | $\varepsilon_{0\_eh}/\varepsilon_{0\_noeh}$ |
|-------------------|-----------------|----------------------------|---------------------------------------------|
| BN                | 7.95            | 0.24                       | 1.39                                        |
| SiC               | 4.93            | 0.29                       | 1.50                                        |
| GeC               | 5.41            | 0.30                       | 1.51                                        |
| BNF               | 12.24           | 0.22                       | 1.27                                        |
| BNH               | 11.92           | 0.18                       | 1.22                                        |
| CF                | 12.27           | 0.21                       | 1.24                                        |
| CH                | 12.88           | 0.17                       | 1.19                                        |
| SiF               | 4.45            | 0.25                       | 1.40                                        |
| SiH               | 4.93            | 0.26                       | 1.39                                        |
| CrO <sub>2</sub>  | 3.66            | 0.31                       | 1.61                                        |
| CrS <sub>2</sub>  | 3.02            | 0.29                       | 1.52                                        |
| CrSe <sub>2</sub> | 2.54            | 0.28                       | 1.53                                        |
| CrTe <sub>2</sub> | 2.07            | 0.28                       | 1.55                                        |
| MoO <sub>2</sub>  | 4.93            | 0.26                       | 1.46                                        |
| MoS <sub>2</sub>  | 4.13            | 0.15                       | 1.21                                        |
| MoSe <sub>2</sub> | 3.66            | 0.25                       | 1.39                                        |
| MoTe <sub>2</sub> | 3.02            | 0.24                       | 1.39                                        |
| WO <sub>2</sub>   | 5.27            | 0.25                       | 1.42                                        |
| WS <sub>2</sub>   | 4.29            | 0.24                       | 1.37                                        |
| WSe <sub>2</sub>  | 3.80            | 0.25                       | 1.37                                        |
| WTe <sub>2</sub>  | 3.18            | 0.24                       | 1.38                                        |
| GaS               | 6.04            | 0.24                       | 1.31                                        |
| GaSe              | 5.25            | 0.23                       | 1.31                                        |
| SnO               | 5.57            | 0.29                       | 1.41                                        |

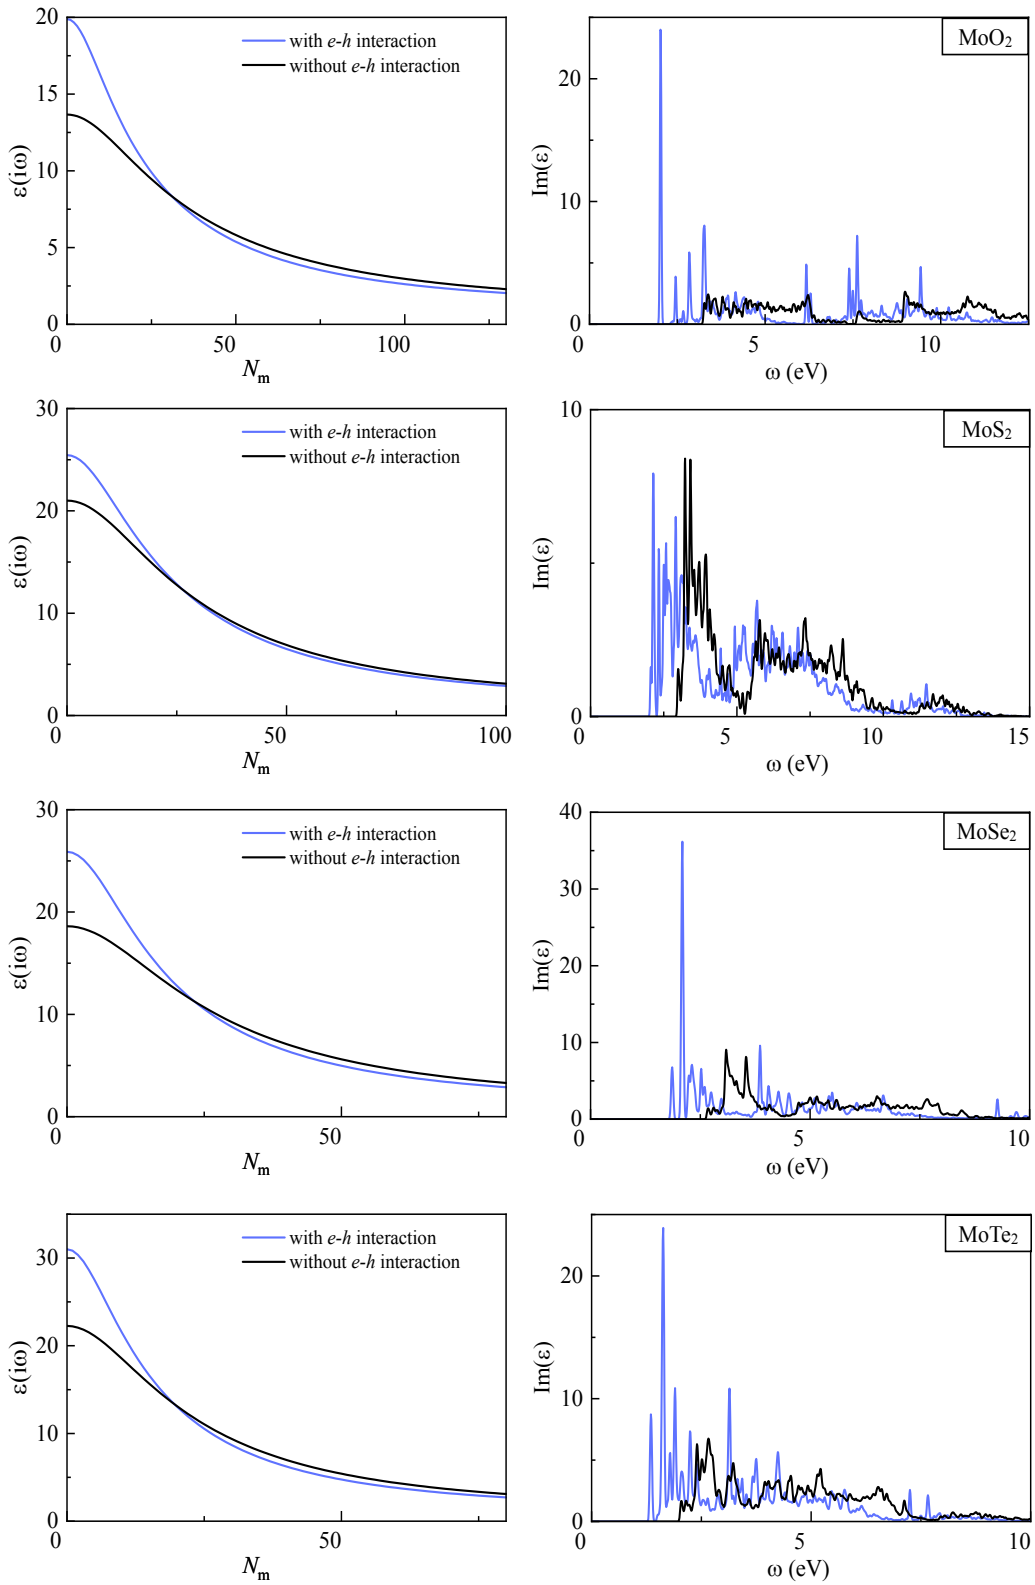

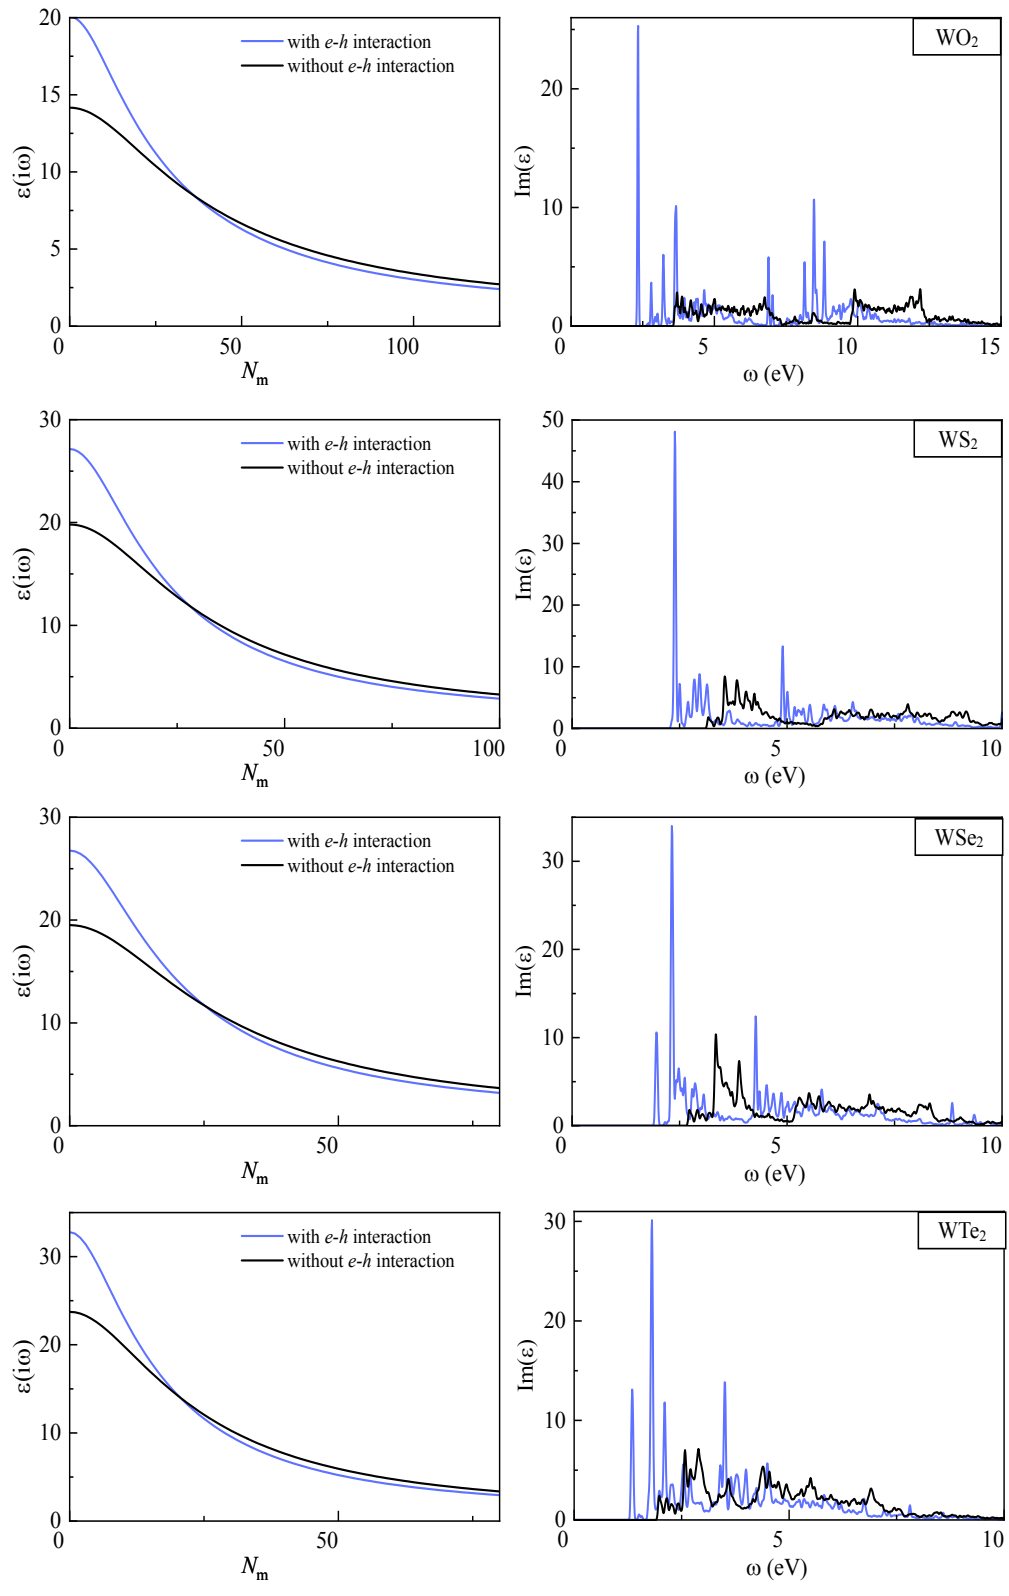

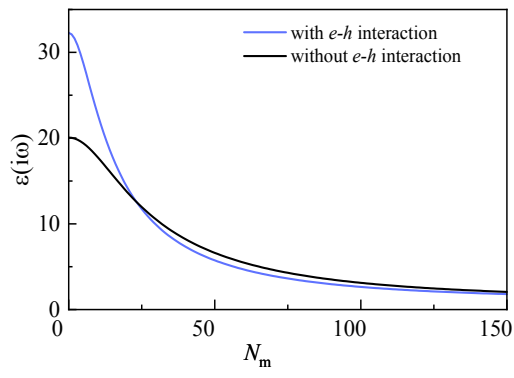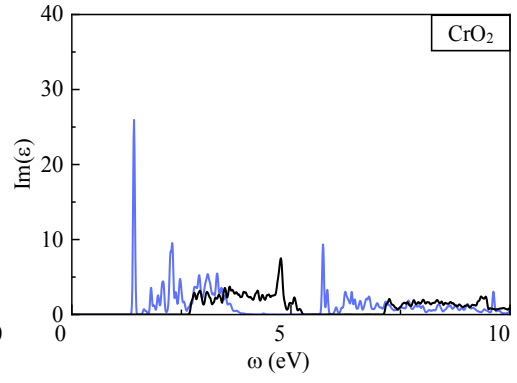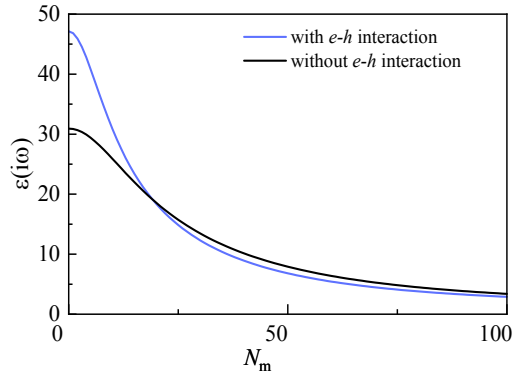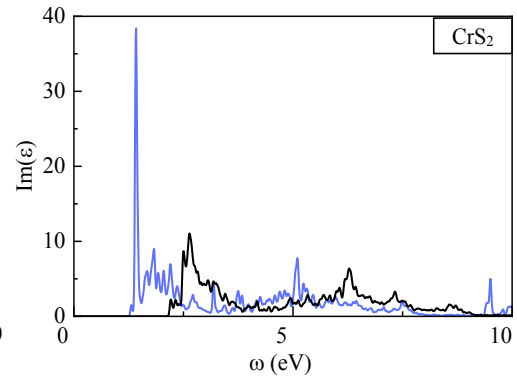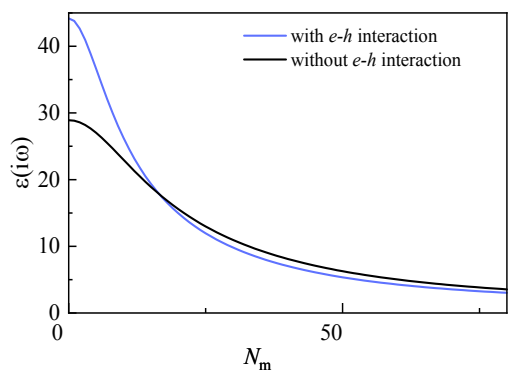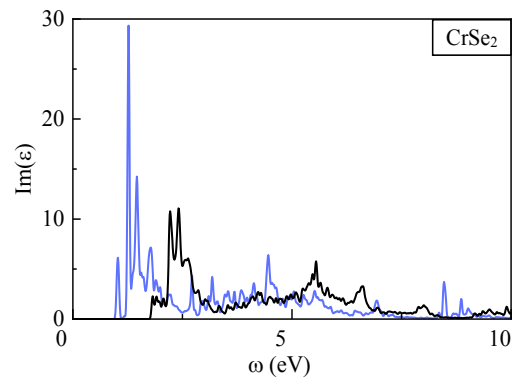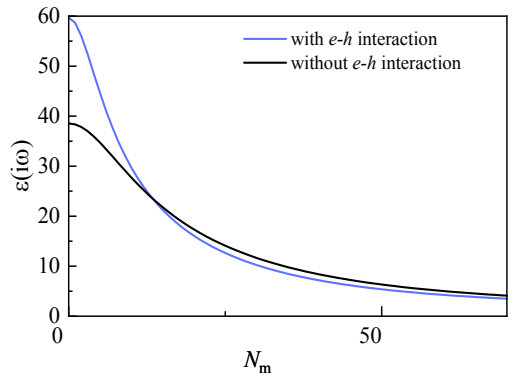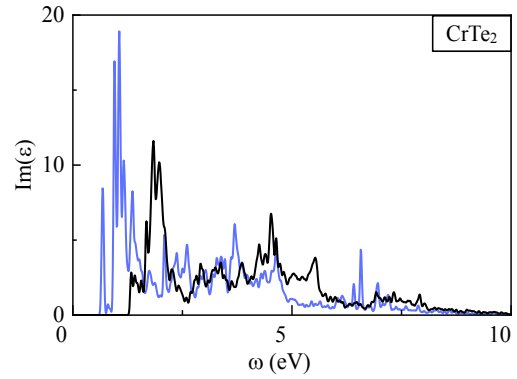

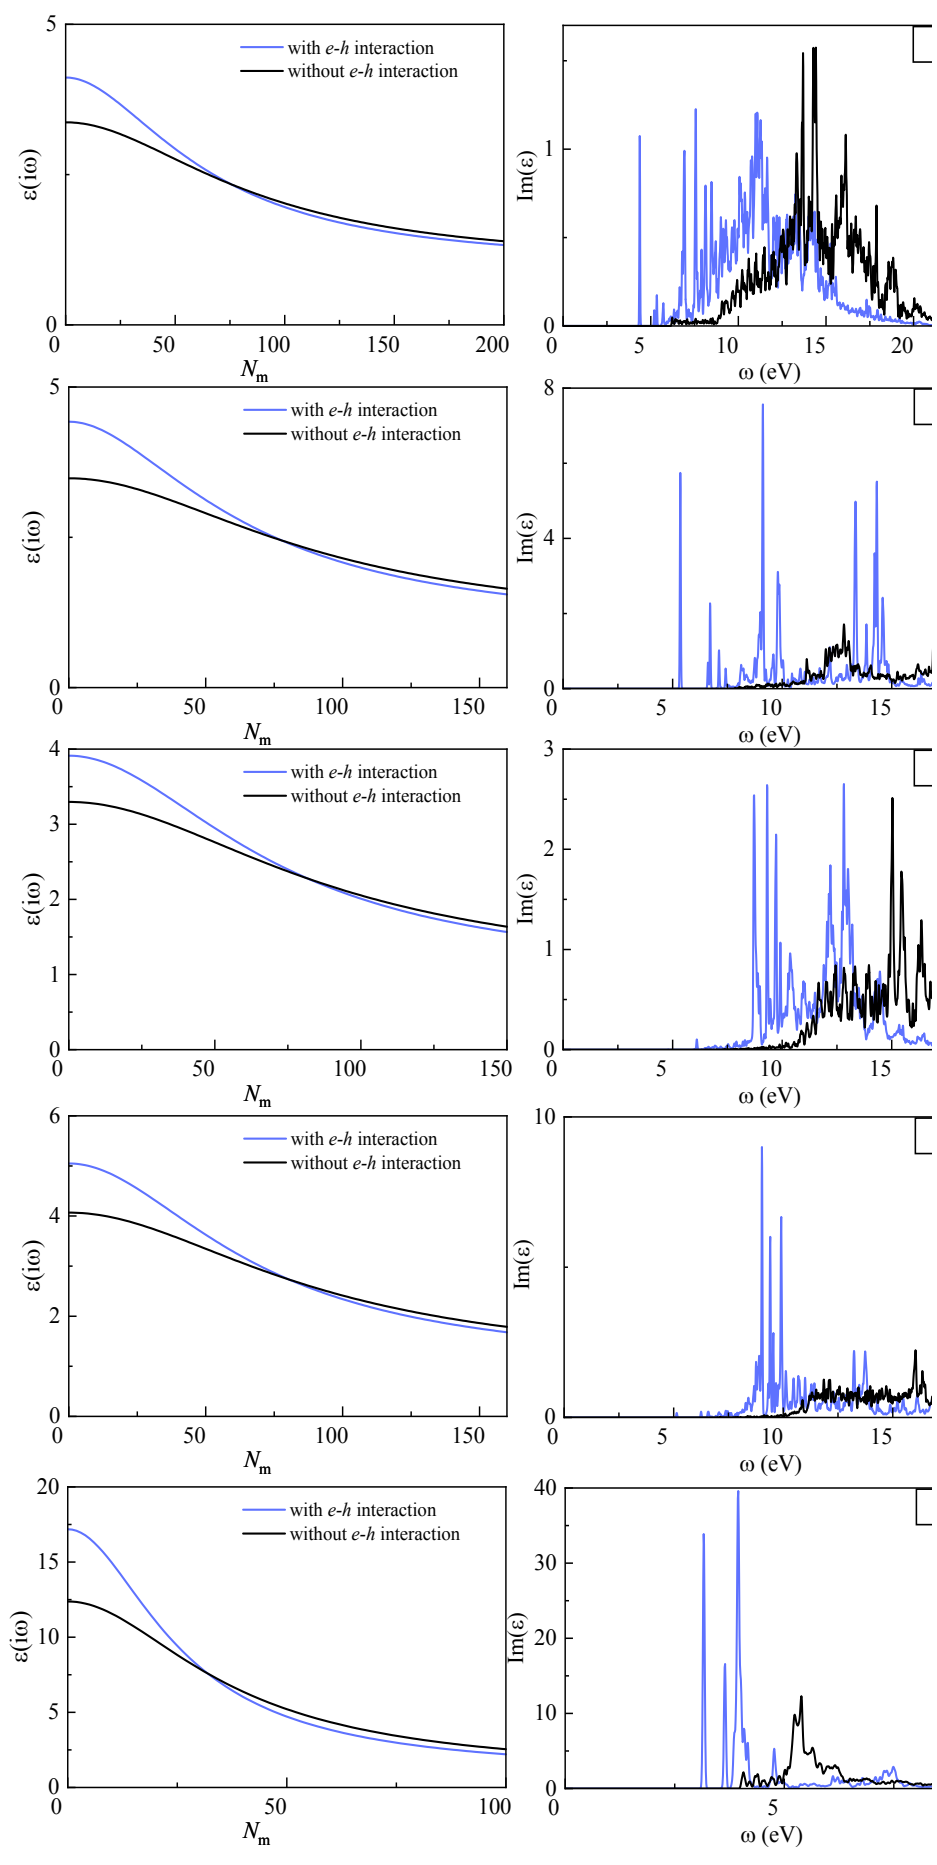

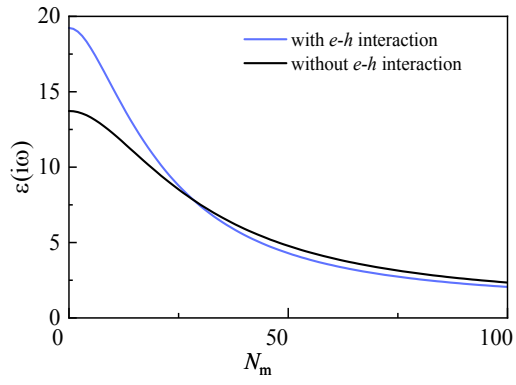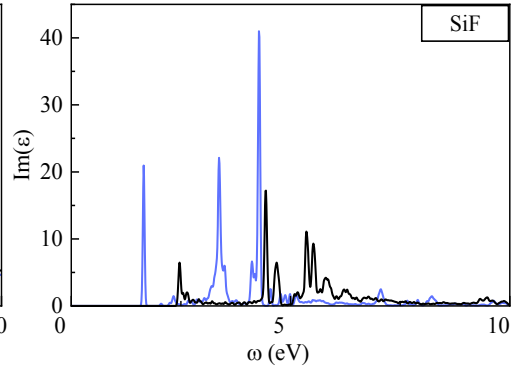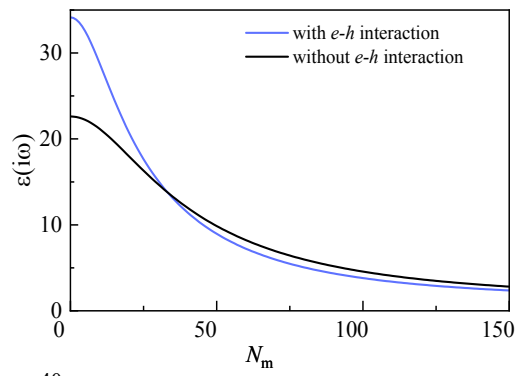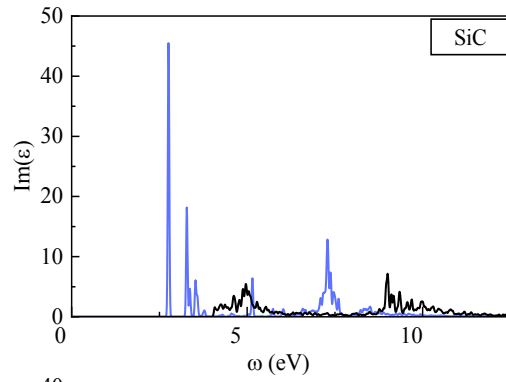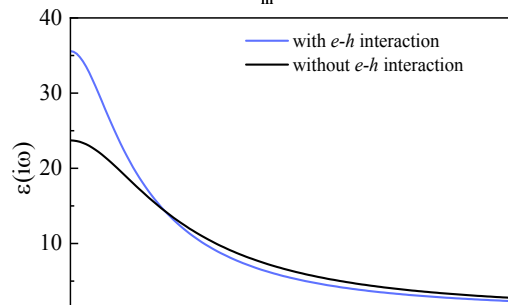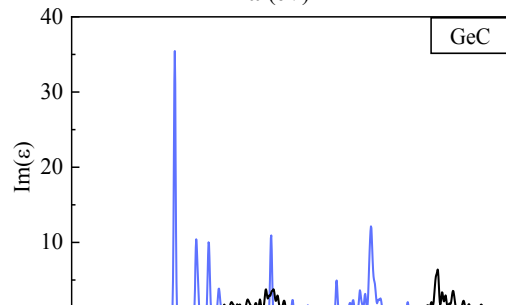

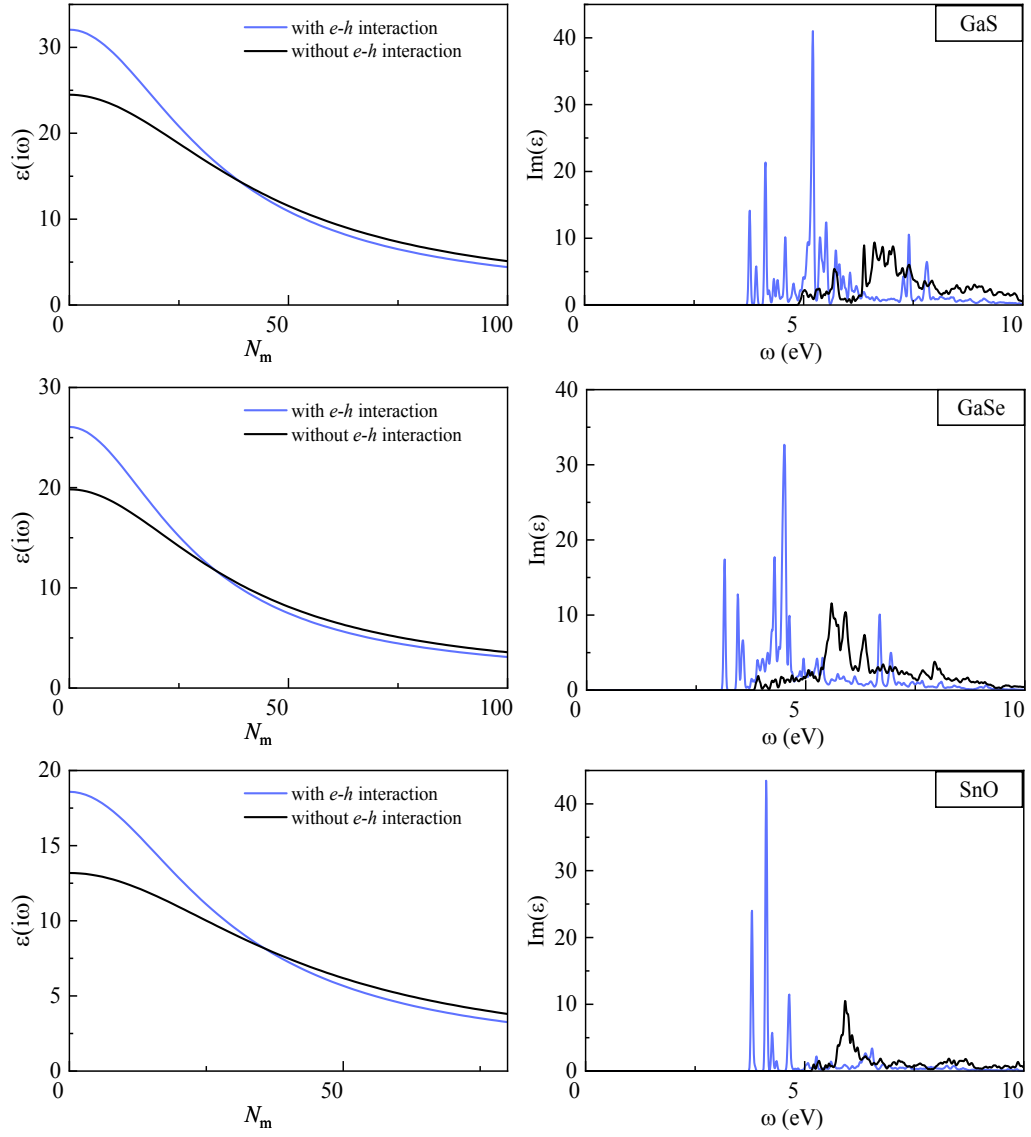

**Fig. S1** Dielectric functions along the imaginary frequency axis and optical absorption spectra of all the considered two-dimensional semiconductors except for those shown in the main manuscript.



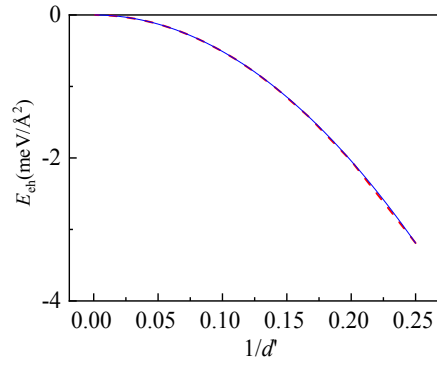

**Fig. S2** VdW energies as a function of the inverse distance  $d^2$  for semi-infinite surfaces of silicon. The  $E$ - $1/d^2$  relations in the distance range from 50 to 10000 Å are fitted by a power functions with an exponent of 2. The Chi-square tolerance for the fitting is set to  $1 \times 10^{-9}$ . The fitted results are visualized with the red dashed curves.

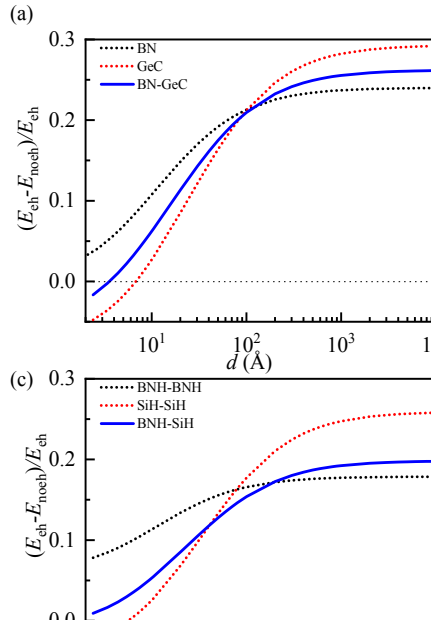

**Fig. S3** Effect of the  $e$ - $h$  interaction on the vdW energy as a function of distance for hetero-bilayers, including (a) BN-GeC, (b)  $\text{CrO}_2$ - $\text{CrS}_2$ , (c) BNH-SiH, and (d) GaS-GaSe.
